# Supplementary material for: Direct coupling of oligomerization and oligomerization-driven endocytosis of the dopamine transporter to its conformational mechanics and activity
Source: PubMed Central journal article supplement (PMC8010718; doi:10.1016/j.jbc.2021.100430), 2021-02-18
Supplement: mmc1.pdf [file mmc1.pdf]

**Supplemental Information – Sorkina et al. Direct coupling of oligomerization and oligomerization-driven endocytosis of the dopamine transporter to its conformational mechanics and activity**

**Figure S1. Experimentally tested AIM-100-like (AL) compounds and other DAT ligands.**

| Action              | Compound | PubChem CID | Structures <sup>a</sup>                                                             |                                                                                     | Volume <sup>b</sup> (Å <sup>3</sup> ) | Apolar desolvation energy (kcal/mol) <sup>c</sup> | Polar desolvation energy (kcal/mol) <sup>d</sup> |
|---------------------|----------|-------------|-------------------------------------------------------------------------------------|-------------------------------------------------------------------------------------|---------------------------------------|---------------------------------------------------|--------------------------------------------------|
|                     |          |             | 2D                                                                                  | 3D                                                                                  |                                       |                                                   |                                                  |
| Effective           | AIM-100  | 11501591    | 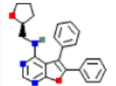   |    | 309.9                                 | 10                                                | -9.82                                            |
|                     | AL3      | 2142801     |    |    | 301.5                                 | -0.96                                             | -8.42                                            |
|                     | AL4      | 1037836     |    |    | 301.8                                 | -0.32                                             | -9.74                                            |
| Partially effective | AL8      | 70588       |    |    | 260.3                                 | 9.34                                              | -12.7                                            |
|                     | AL2      | 1068329     |   |   | 304.0                                 | 0.38                                              | -13.6                                            |
|                     | AL5      | 1596636     |  |  | 318.3                                 | -0.84                                             | -8.88                                            |
| ineffective         | AL1      | 1583275     |  |  | 287.3                                 | 7.22                                              | -10.3                                            |
|                     | AL6      | 30976       |  |  | 115.1                                 | 1.37                                              | -10.0                                            |
|                     | AL7      | 3830        |  |  | 169.2                                 | 5.13                                              | -10.7                                            |
|                     | AL9      | 252499      |  |  | 196.9                                 | 1.25                                              | -7.65                                            |
|                     | AL10     | 10614       |  |  | 220.8                                 | 11.81                                             | -3.25                                            |
|                     | AL11     | 6406861     |  |  | 276.6                                 | 11.94                                             | -7.32                                            |
|                     | AL12     | 23662871    |  |  |                                       |                                                   |                                                  |

|                     |                   |          |                                                                                    |       |       |        |
|---------------------|-------------------|----------|------------------------------------------------------------------------------------|-------|-------|--------|
|                     | AL13              | 10232    | 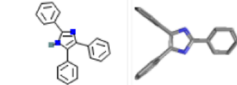  | 247.4 | 11.8  | -8.79  |
|                     | AL14              | 69588    |   | 183.9 | 8.91  | -8.48  |
|                     | AL15              | 679479   |   | 202.1 | 8.99  | -11.26 |
|                     | AL16<br>GBR 12935 | 11957553 |   |       |       |        |
| Other drugs/ligands | Cocaine           | 446220   |   | 248.1 | 3.63  | -32.1  |
|                     | Modafinil         | 4236     |   | 223.4 | 4.58  | -19.4  |
|                     | dopamine          | 681      |   | 128.4 | -1.62 | -50.2  |
|                     | Amphetamine       | 3007     |  | 129.6 | 4.01  | -39.1  |

<sup>a</sup>2D and 3D structures taken from PubChem

<sup>b</sup>molecular volumes calculated through <http://www.scfbio-iitd.res.in/software/drugdesign/VolumeCalculator.jsp>

<sup>c</sup>apolar desolvation energy are taken from ZINC <sup>d</sup>polar desolvation energy taken from ZINC

Effective, partially effective, ineffective compounds, and DAT ligands are shaded in orange, green and blue and white.

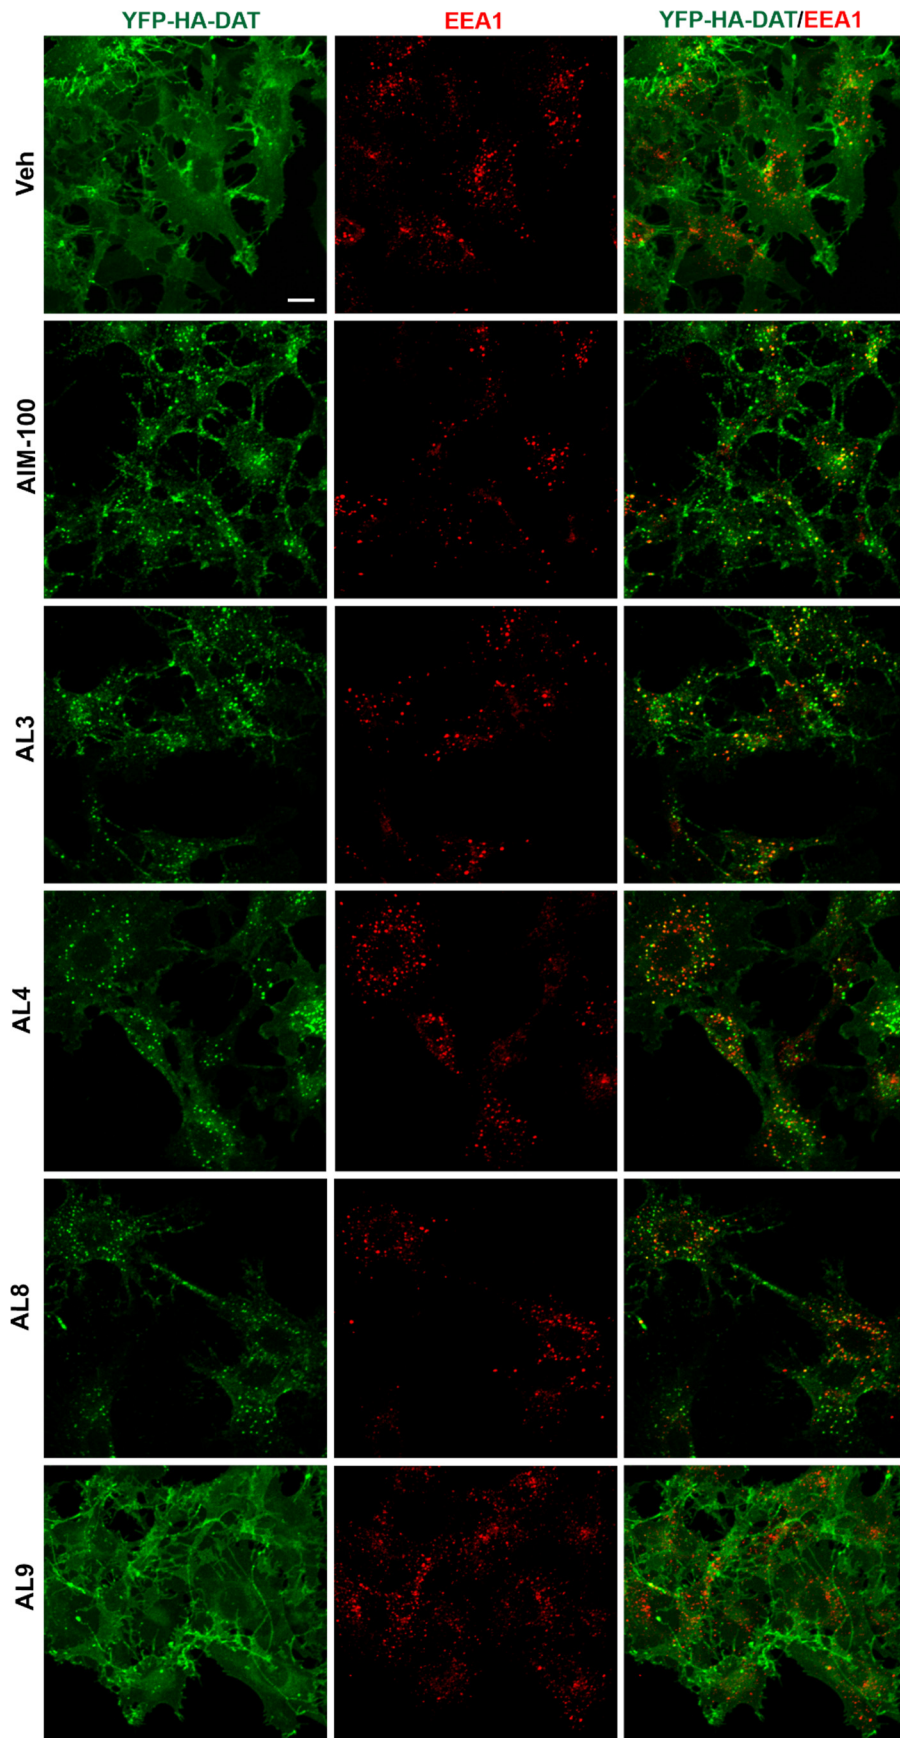

**Figure S2. Effect of AIM-100 and ALs on YFP-HA-DAT internalization into early endosomes.**

PAE/YFP-HA-DAT cells were incubated with vehicle (DMSO), AIM-100, AL3, AL4, AL8 or AL9 (all 30  $\mu$ M) for 2 hrs at 37°C, fixed and immunolabeled with EEA.1 antibody. 3D images were acquired through the 488-nm (YFP, *green*) and 561-nm (EEA1, *red*) channels. Maximum intensity projections of representative 3D images are presented. Scale bar, 10  $\mu$ m.

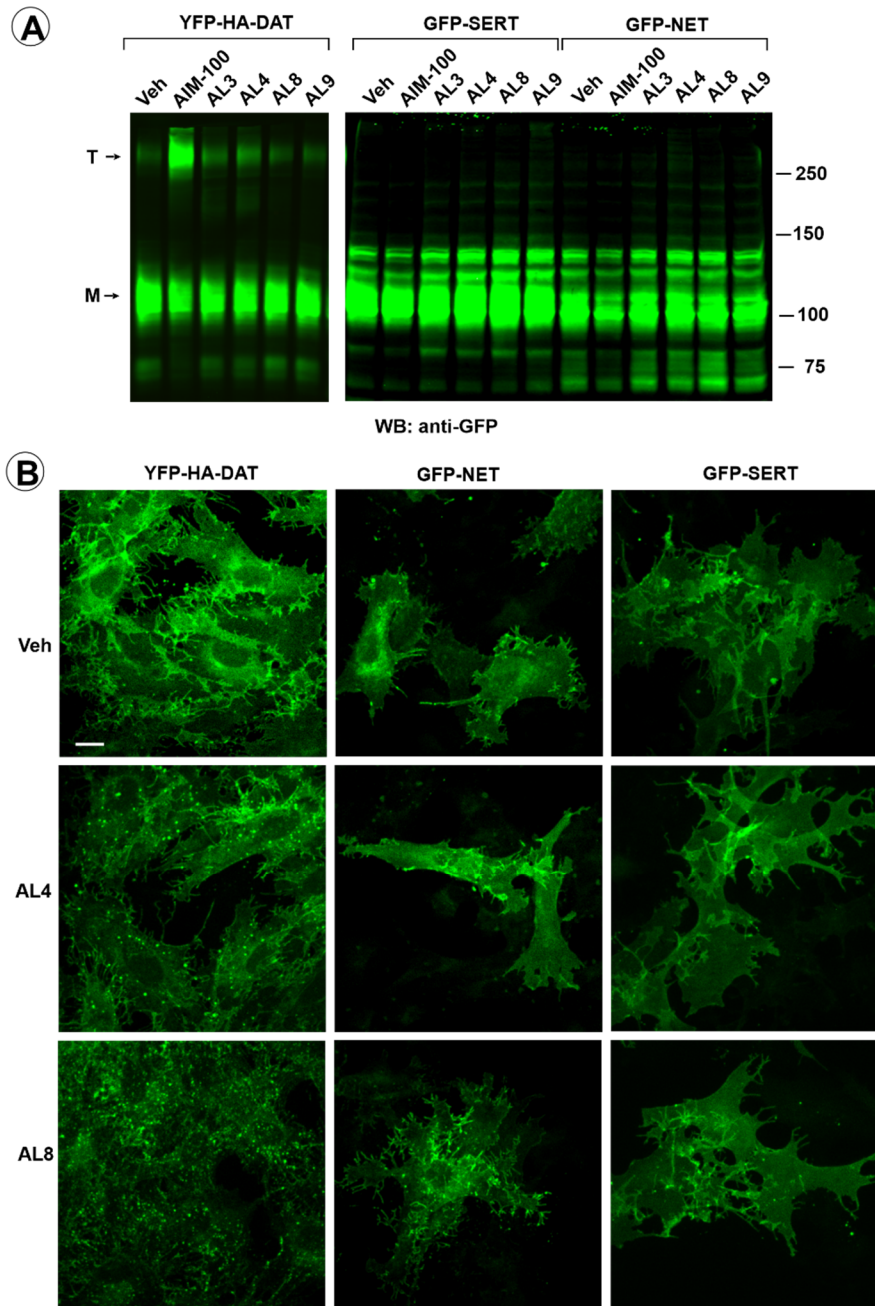

**Figure S3. ALs do not enhance oligomerization of NET and SERT or cause their accumulation in endosomes.** (A) PAE cells stably expressing YFP-HA-DAT, GFP-NET or GFP-SERT were incubated with vehicle (*Veh*; DMSO), AIM-100, AL3, AL4, AL8 or AL9 (all 20 μM) at 37°C for 2 hrs. Lysates were resolved by SDS-PAGE and probed by western blotting with the GFP antibody. Blots of YFP-HA-DAT and GFP-NET/GFP-SERT are from the same gel. *M*, monomers; *T*, trimers. (B) PAE cells stably expressing YFP-HA-DAT, GFP-NET or GFP-SERT were incubated with vehicle (DMSO), AL4 or AL8 (all 20 μM) for 2 hrs at 37°C. 3D images were acquired from fixed cells through the 488-nm (YFP, *green*). Maximal intensity projections of representative 3D images are presented. Scale bar, 10 μm. Data are representative of three independent experiments.

**A**

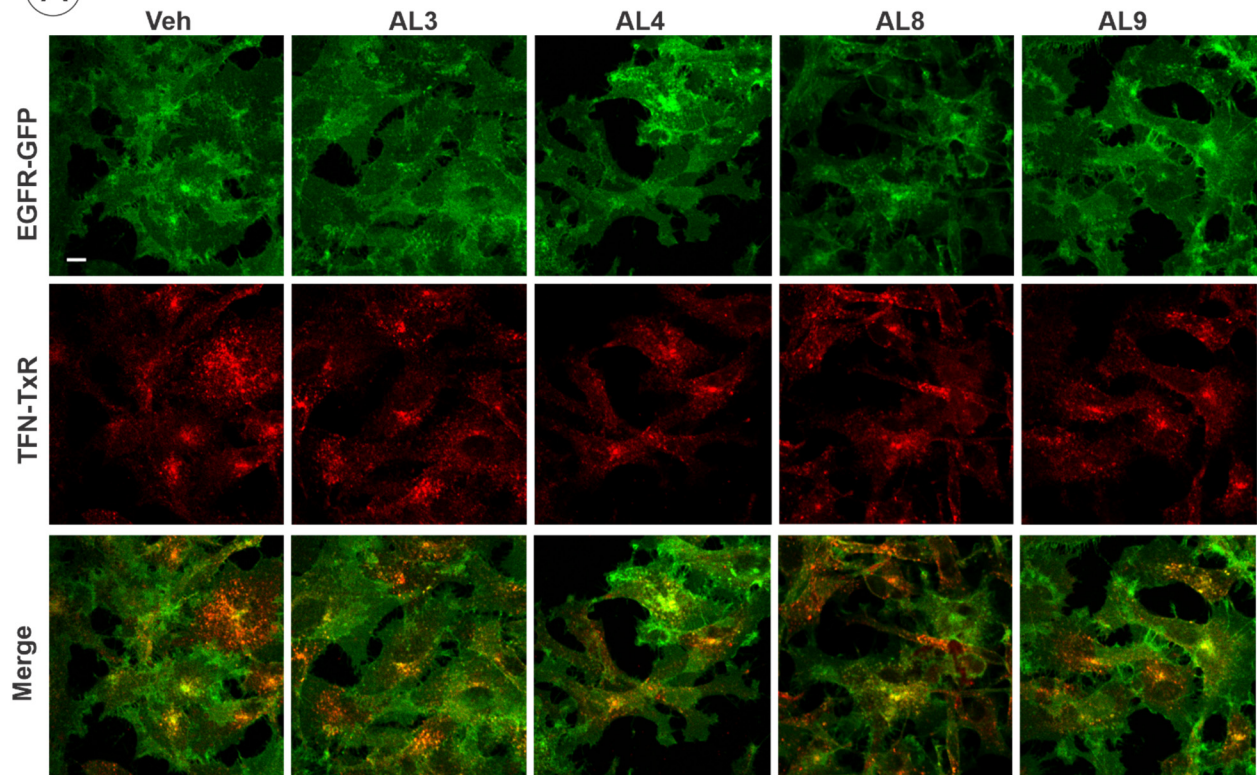

**B**

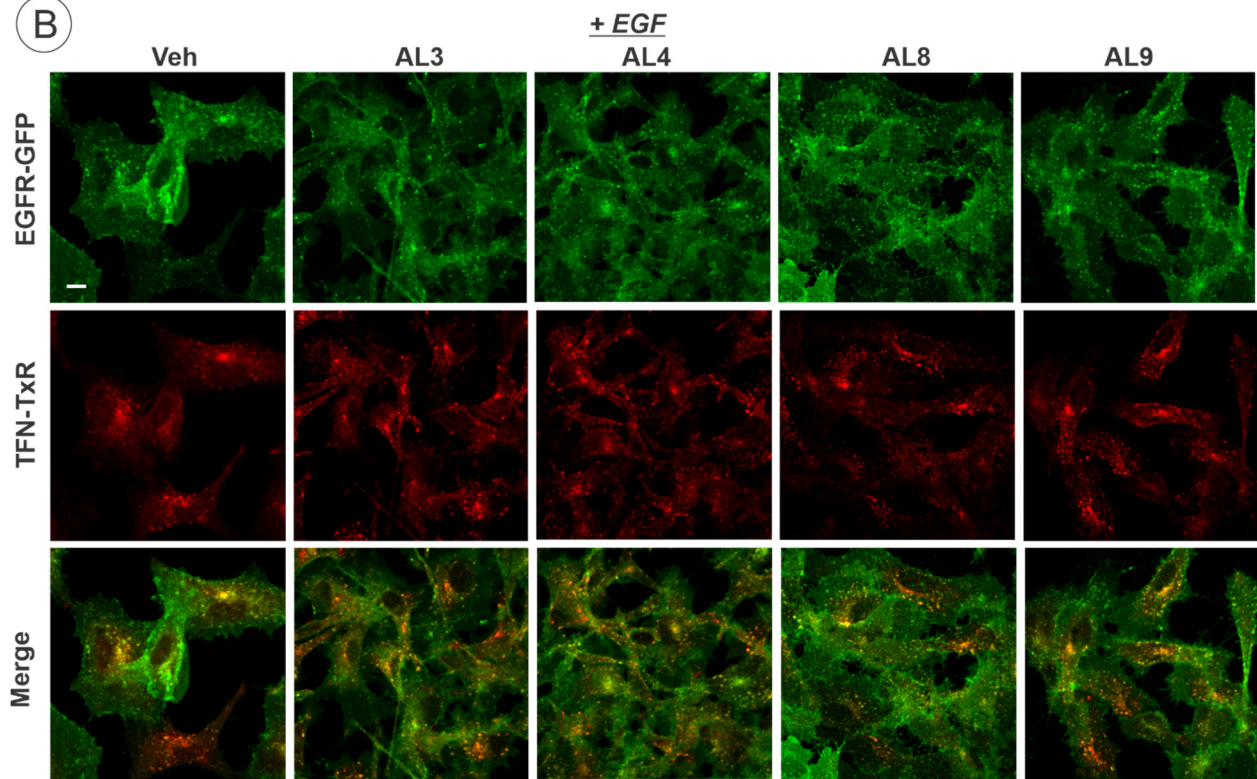

**Figure S4. ALs do not affect constitutive and EGF-stimulated endocytosis of EGFR-GFP and endocytosis of transferrin.**

(A) PAE/EGFR-GFP cells were incubated with DMSO (veh), AL3, AL4, AL8 or AL9 (all 40  $\mu$ M) for 2 hrs at 37°C, and then incubated with 5  $\mu$ g/ml TexasRed-conjugated transferrin (TFN-TxR) for 15 min at 37°C. Cells were fixed and 3D images were acquired through 488 nm (green, GFP) and 561 nm (red, TexasRed) channels. Representative individual confocal sections through the middle of cells are presented. Scale bars, 10  $\mu$ m.

(B) PAE/EGFR-GFP cells were incubated with DMSO (veh), AL3, AL4, AL8 or AL9 (all 40  $\mu$ M) for 2 hrs at 37°C, and then incubated with 5  $\mu$ g/ml Tfn-TxR and 100 ng/ml EGF for 15 min at 37°C. Cells were fixed and 3D images were acquired through 488 nm (green, GFP) and 561 nm (red, TexasRed) channels. Representative individual confocal sections through the middle of cells are presented. Scale bars, 10  $\mu$ m.

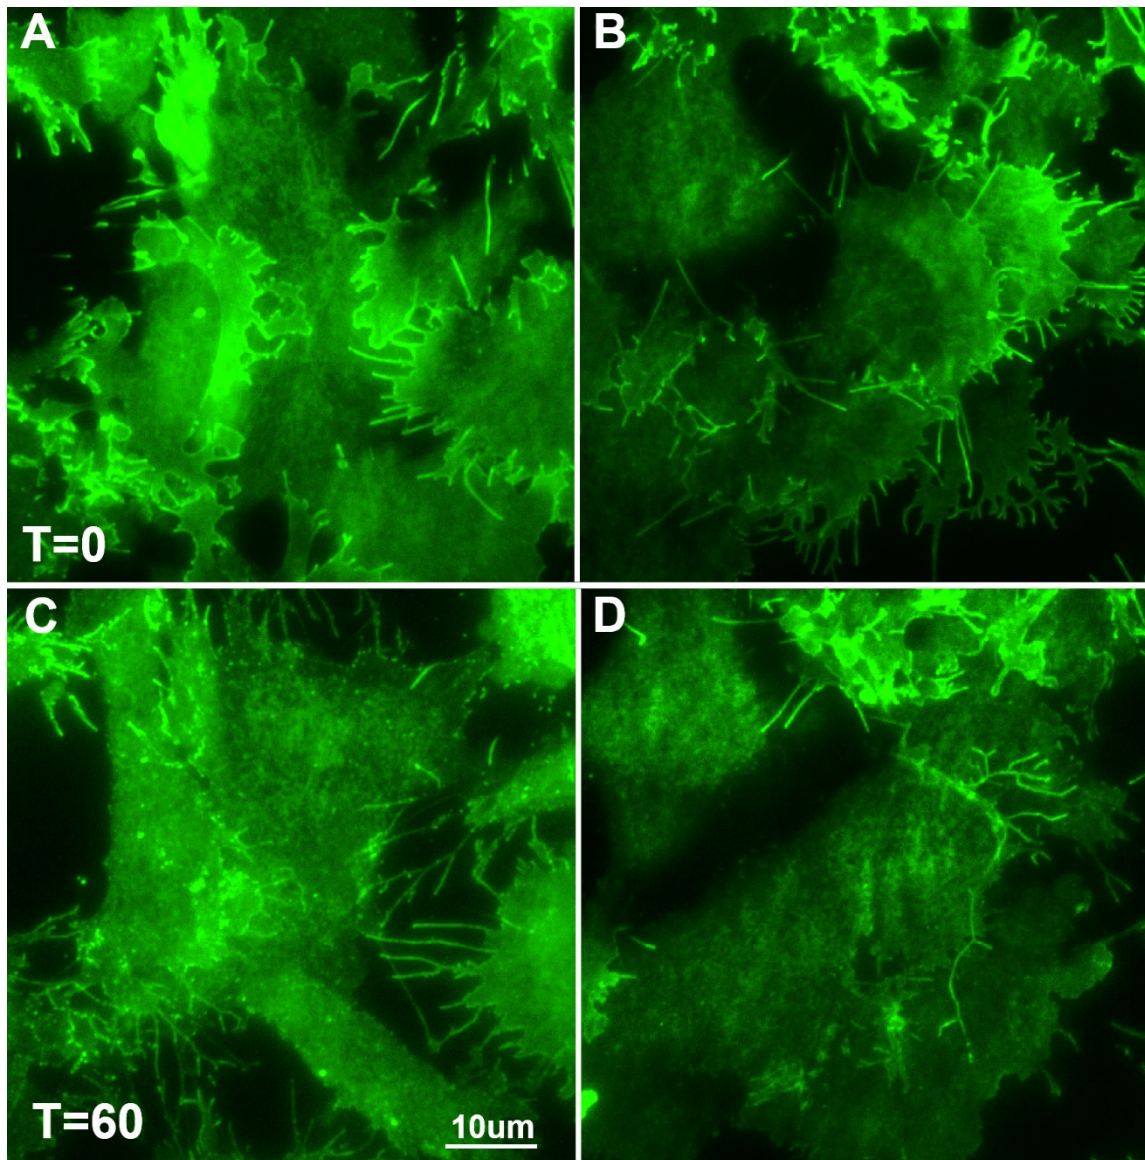

**Figure S5. Time-lapse TIR-FM imaging** of PAE/YFP-HA-DAT (A and C) and PAE/TM4-9 (B and D) cells. Individual time frames before (T=0) and 60 min (T=60) after addition of AIM-100 (20  $\mu$ M) are shown. Note the reticular tubular fluorescence that represents endoplasmic reticulum situated in close proximity to the bottom-cell plasma membrane. See Video S3.



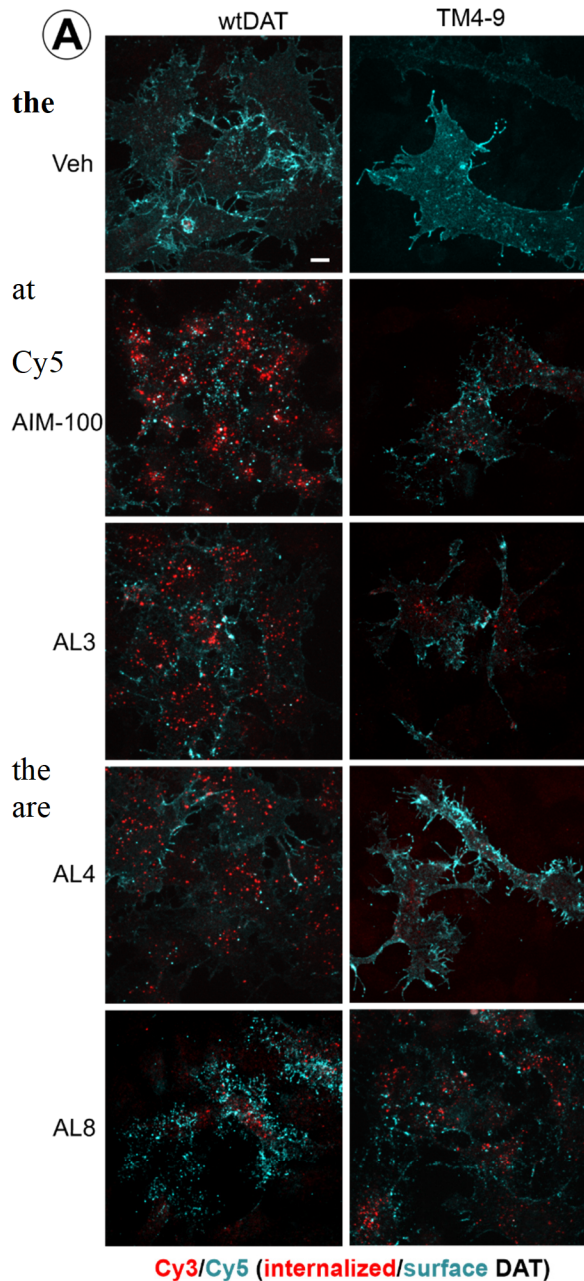

**Figure S6. Mutations in TM4 and TM9 inhibit effects of ALs on DAT endocytosis.**

**(A)** PAE/YFP-HA-DAT and PAE/TM4-9 cells were incubated with HA11 for 60 min at 37°C, and then incubated with vehicle (DMSO), AIM-100, AL3, AL4 or AL8 (all 20  $\mu$ M) for 2 hrs 37°C. After fixation, cultures were stained with secondary anti-mouse antibodies conjugated with (*surface HA-DAT*), permeabilized with Triton X-100 and stained with secondary anti-mouse conjugated with Cy3 (*internalized HA-DAT*). 3D images were acquired through 488 (YFP, not shown), 561 (Cy3, red) and 640 nm (Cy5, cyan) channels. Maximum intensity projections of representative 3D images are shown. Scale bar, 10  $\mu$ m.

**(B)** Cy3/Cy5 ratios were calculated in experiments exemplified in (A). Values of the ratio in different experiments are normalized to ratio value in cells treated with AIM-100. Results presented as mean values of the ratio ( $\pm$ S.D.; n=9-12). P values for “wt DAT” versus “TM4-9” for each compound treatment were calculated using two-tail, unpaired T-test. *n.s.*, not significant.

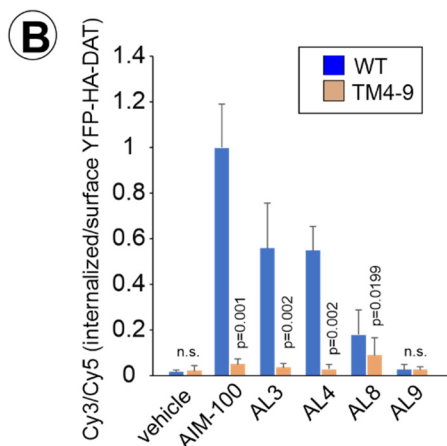

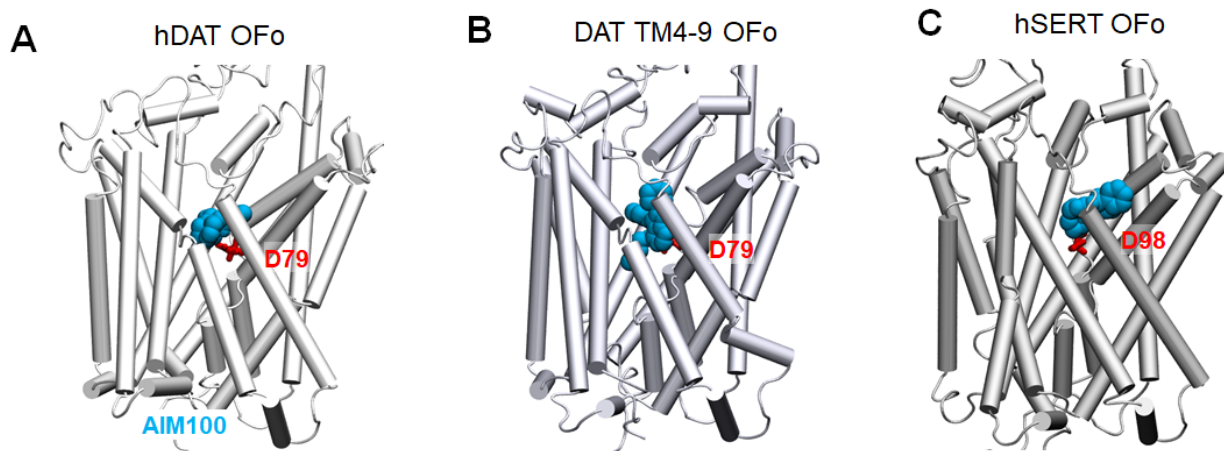

**Figure S7. Most probable binding poses of AIM-100 to the outward-facing open conformer** of (A) human DAT; and (B) DAT TM4-9 mutant, in monomeric state. In the OFo conformation, AIM-100 or AL molecules (not shown) are predicted to bind to S1 or S2 sites within the extracellular vestibule. The AIM-100 binding affinity was calculated to be  $-6.8 \pm 0.5$  kcal/mol, and  $-7.1 \pm 0.5$  kcal/mol, for OFo hDAT and TM4-9 mutant, respectively.

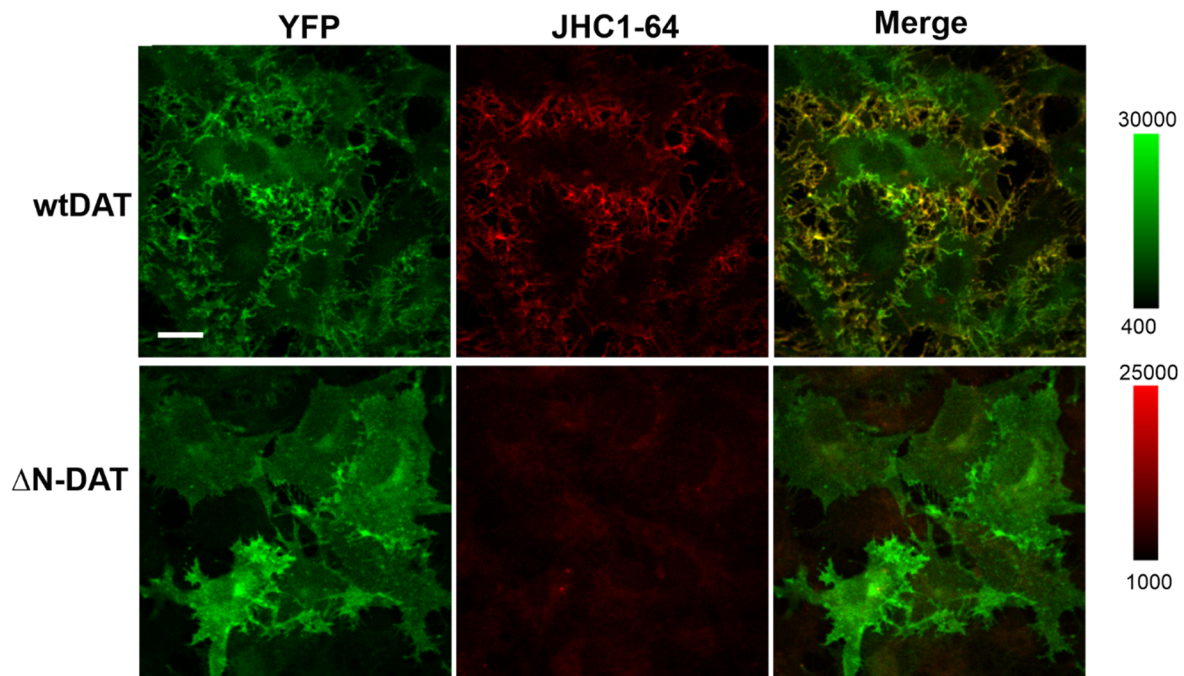

**Figure S8. YFP-HA- $\Delta$ N-DAT mutant does not bind JHC 1-64.**

PAE/YFP-HA-DAT (*wtDAT*) and PAE/YFP-HA- $\Delta$ N-DAT cells ( *$\Delta$ N-DAT*) were incubated with 100 nM JHC 1-64 in F12 supplemented with 10 mM Hepes (pH7.4) for 15 min at room temperature. 3-D images were acquired from fixed cells through 488 nm (YFP) and 561 nm (JHC 1-64) channels. Individual confocal sections of representative 3D images are shown. Scale bar, 10  $\mu$ m.

## **Video captions**

**Video S1.** Time-lapse 3D imaging of PAE/YFP-HA-DAT (WT13) cells incubated with AL4 (20  $\mu$ M) at 37°C was performed using the LLS system. Image acquisition intervals were 15 sec. Maximum intensity projections of 3D images are presented. Scale bar, 5  $\mu$ m.

**Video S2.** Time-lapse 3D imaging of PAE/YFP-HA- $\Delta$ N-DAT cells incubated with AL4 (20  $\mu$ M) at 37°C was performed using the LLS system. Image acquisition intervals were 15 sec. Maximum intensity projections of 3D images are presented. Scale bar, 5  $\mu$ m.

**Video S3.** Time-lapse TIR-FM imaging of PAE/YFP-HA-DAT and PAE/TM4-9 cells was performed at 37°C before and after addition of AIM-100 (20  $\mu$ M).
